# Supplementary material for: Eating Behaviors, Depressive Symptoms and Lifestyle in University Students in Poland
Source: MDPI journal article supplement (doi:10.3390/nu14051106), 2022-03-06
Supplement: s1 [file s1]

Supplementary

# Eating Behaviors and Lifestyle in Polish Students

Julia Suwalska <sup>1,\*</sup>, Kalina Kolasinska <sup>2</sup>, Dorota Łojko <sup>3</sup> and Paweł Bogdański <sup>1</sup>

**Table S1.** Participants' body mass index, symptoms of depression, impulsiveness, eating behaviors, diet, hypothyroidism, dieting and physical activity broken down by Body Mass Index; non-overweight  $n = 191$ , overweight/obese  $n = 36$ .

|                                                   | Non-overweight    |                  | Overweight/obese |                  | <i>p</i> |
|---------------------------------------------------|-------------------|------------------|------------------|------------------|----------|
|                                                   | Mean              | SD               | Mean             | SD               |          |
| Body Mass Index                                   | 21.1              | 2.1              | 28.8             | 3.6              | 0.000    |
| Beck Depression Inventory                         | 7.8               | 7.3              | 7.9              | 7.8              | n.s.     |
| Barratt Impulsiveness Scale                       |                   |                  |                  |                  |          |
| Total                                             | 23.2 <sup>a</sup> | 4.5 <sup>a</sup> | 22.4             | 3.9              | n.s.     |
| Non-planning                                      | 19.3 <sup>a</sup> | 4.2 <sup>a</sup> | 19.2             | 3.7              | n.s.     |
| Motor                                             | 18.0 <sup>a</sup> | 3.8 <sup>a</sup> | 18.5             | 4.1              | n.s.     |
| Attentional                                       | 60.1 <sup>a</sup> | 9.7 <sup>a</sup> | 59.6             | 9.1              | n.s.     |
| Three-Factor Eating Questionnaire                 |                   |                  |                  |                  |          |
| Cognitive Restraint                               | 33.0              | 14.6             | 34.7             | 13.7             | n.s.     |
| Uncontrolled Eating                               | 24.0              | 12.7             | 26.6             | 14.0             | n.s.     |
| Emotional Eating                                  | 23.1              | 19.5             | 35.2             | 21.8             | 0.001    |
| Food Frequency Questionnaire (aggregated)         |                   |                  |                  |                  |          |
| Sugar, sweets and snacks                          | 1.7               | 1.3              | 1.5              | 1.2              | n.s.     |
| Milk, fermented milk drinks and curd cheese       | 1.2               | 0.8              | 1.4              | 0.9              | n.s.     |
| Sweetened milk products                           | 0.4               | 0.5              | 0.4              | 0.4              | n.s.     |
| Cheese                                            | 0.6               | 0.5              | 0.6              | 0.5              | n.s.     |
| Eggs and egg dishes                               | 0.4               | 0.4              | 0.4              | 0.4              | n.s.     |
| Breakfast cereals                                 | 0.2               | 0.3              | 0.2              | 0.3              | n.s.     |
| Whole grain products                              | 0.9               | 0.7              | 0.9              | 0.6              | n.s.     |
| Refined grain products                            | 0.9 <sup>b</sup>  | 0.6 <sup>b</sup> | 0.7              | 0.5              | n.s.     |
| Butter and cream                                  | 0.8 <sup>a</sup>  | 0.7 <sup>a</sup> | 0.7              | 0.5              | n.s.     |
| Other animal fats                                 | 0.0               | 0.1              | 0.0              | 0.1              | n.s.     |
| Vegetable oils                                    | 0.5               | 0.4              | 0.4              | 0.4              | n.s.     |
| Other edible fats                                 | 0.3               | 0.4              | 0.2              | 0.3              | n.s.     |
| Fruits                                            | 0.8 <sup>b</sup>  | 0.5 <sup>b</sup> | 0.9              | 0.6              | n.s.     |
| Dried fruit, fruit preserves and fruit condiments | 0.3               | 0.4              | 0.2              | 0.3              | n.s.     |
| Vegetables                                        | 0.9               | 0.5              | 0.8              | 0.6              | n.s.     |
| Dry and processed pulses                          | 0.2               | 0.3              | 0.2              | 0.2              | n.s.     |
| Potatoes                                          | 0.4               | 0.3              | 0.3              | 0.3              | n.s.     |
| Nuts and seeds                                    | 0.5               | 0.5              | 0.4              | 0.4              | n.s.     |
| Processed meats                                   | 0.7 <sup>b</sup>  | 0.7 <sup>b</sup> | 0.7 <sup>c</sup> | 0.6 <sup>c</sup> | n.s.     |
| Red meat and venison                              | 0.2 <sup>b</sup>  | 0.3 <sup>b</sup> | 0.2 <sup>c</sup> | 0.2 <sup>c</sup> | n.s.     |
| White meat                                        | 0.4 <sup>b</sup>  | 0.3 <sup>b</sup> | 0.3 <sup>c</sup> | 0.2 <sup>c</sup> | n.s.     |
| Fish                                              | 0.2 <sup>b</sup>  | 0.3 <sup>b</sup> | 0.1 <sup>c</sup> | 0.2 <sup>c</sup> | n.s.     |
| Juices                                            | 0.4 <sup>b</sup>  | 0.5 <sup>b</sup> | 0.4 <sup>c</sup> | 0.5 <sup>c</sup> | n.s.     |
| Sweetened beverages and energy drinks             | 0.2 <sup>a</sup>  | 0.4 <sup>a</sup> | 0.2 <sup>c</sup> | 0.3 <sup>c</sup> | n.s.     |
| Alcohol                                           | 0.3 <sup>a</sup>  | 0.4 <sup>a</sup> | 0.4 <sup>c</sup> | 0.4 <sup>c</sup> | n.s.     |
|                                                   | <i>n</i>          | %                | <i>n</i>         | %                | <i>p</i> |

|                                               |     |      |    |      |       |
|-----------------------------------------------|-----|------|----|------|-------|
| Hypothyroidism                                |     |      |    |      |       |
| Yes                                           | 14  | 7.3  | 7  | 19.4 | 0.021 |
| No                                            | 177 | 92.7 | 29 | 80.6 |       |
| On diet                                       |     |      |    |      |       |
| Yes                                           | 39  | 20.4 | 8  | 22.2 | n.s.  |
| No                                            | 152 | 79.6 | 28 | 77.8 |       |
| International Physical Activity Questionnaire |     |      |    |      |       |
| Low activity                                  | 41  | 21.5 | 10 | 27.8 | n.s.  |
| Moderate-high activity                        | 150 | 78.5 | 26 | 72.2 |       |
| Polish-adapted Mediterranean Diet             |     |      |    |      |       |
| Low adherence                                 | 53  | 27.7 | 8  | 22.2 | n.s.  |
| Average-high adherence                        | 138 | 72.3 | 28 | 77.8 |       |

SD – standard deviation; <sup>a</sup> *n* = 189; <sup>b</sup> *n* = 190; <sup>c</sup> *n* = 35.

**Table S2.** Participants' body mass index, symptoms of depression, impulsiveness, eating behaviors, diet, hypothyroidism, dieting and physical activity broken down by Cognitive Restraint (CR) – median split; low CR  $n = 99$ , high CR  $n = 128$ .

| Low CR                                            |                   |      | High CR          |      |          |
|---------------------------------------------------|-------------------|------|------------------|------|----------|
|                                                   | Mean              | SD   | Mean             | SD   | <i>p</i> |
| Body Mass Index                                   | 21.7              | 3.6  | 22.8             | 3.7  | 0.025    |
| Beck Depression Inventory                         | 6.9               | 7.1  | 8.6              | 7.5  | n.s.     |
| Barratt Impulsiveness Scale                       |                   |      |                  |      |          |
| Total                                             | 60.7 <sup>a</sup> | 9.9  | 59.6             | 9.3  | n.s.     |
| Non-planning                                      | 23.8 <sup>a</sup> | 4.6  | 22.5             | 4.2  | 0.022    |
| Motor                                             | 19.4 <sup>a</sup> | 4.4  | 19.2             | 3.9  | n.s.     |
| Attentional                                       | 17.6 <sup>a</sup> | 3.8  | 18.5             | 3.8  | n.s.     |
| Three-Factor Eating Questionnaire                 |                   |      |                  |      |          |
| Cognitive Restraint                               | 20.2              | 8.1  | 43.4             | 9.1  | 0.000    |
| Uncontrolled Eating                               | 24.0              | 14.2 | 24.8             | 11.9 | n.s.     |
| Emotional Eating                                  | 21.3              | 21.2 | 27.9             | 19.2 | 0.015    |
| Food Frequency Questionnaire (aggregated)         |                   |      |                  |      |          |
| Sugar, sweets and snacks                          | 1.9               | 1.4  | 1.4              | 1.1  | 0.002    |
| Milk, fermented milk drinks and curd cheese       | 1.2               | 0.7  | 1.3              | 0.8  | n.s.     |
| Sweetened milk products                           | 0.4               | 0.5  | 0.3              | 0.5  | n.s.     |
| Cheese                                            | 0.7               | 0.5  | 0.5              | 0.4  | 0.003    |
| Eggs and egg dishes                               | 0.4               | 0.5  | 0.4              | 0.4  | n.s.     |
| Breakfast cereals                                 | 0.2               | 0.2  | 0.2              | 0.3  | n.s.     |
| Whole grain products                              | 0.8               | 0.7  | 0.9              | 0.6  | n.s.     |
| Refined grain products                            | 1.0 <sup>b</sup>  | 0.6  | 0.7              | 0.5  | 0.000    |
| Butter and cream                                  | 1.0               | 0.8  | 0.6 <sup>c</sup> | 0.6  | 0.000    |
| Other animal fats                                 | 0.0               | 0.1  | 0.0              | 0.1  | n.s.     |
| Vegetable oils                                    | 0.6               | 0.5  | 0.5              | 0.4  | n.s.     |
| Other edible fats                                 | 0.4               | 0.5  | 0.2              | 0.3  | 0.000    |
| Fruits                                            | 0.8               | 0.5  | 0.9 <sup>d</sup> | 0.6  | n.s.     |
| Dried fruit, fruit preserves and fruit condiments | 0.3               | 0.4  | 0.3              | 0.4  | n.s.     |
| Vegetables                                        | 0.9               | 0.5  | 0.9              | 0.5  | n.s.     |
| Dry and processed pulses                          | 0.1               | 0.2  | 0.2              | 0.3  | n.s.     |
| Potatoes                                          | 0.4               | 0.3  | 0.3              | 0.3  | 0.023    |
| Nuts and seeds                                    | 0.3               | 0.4  | 0.5              | 0.6  | 0.008    |
| Processed meats                                   | 0.8 <sup>b</sup>  | 0.8  | 0.5 <sup>d</sup> | 0.6  | 0.002    |
| Red meat and venison                              | 0.2 <sup>b</sup>  | 0.3  | 0.2 <sup>d</sup> | 0.2  | n.s.     |
| White meat                                        | 0.4 <sup>b</sup>  | 0.3  | 0.4 <sup>d</sup> | 0.3  | n.s.     |
| Fish                                              | 0.1 <sup>b</sup>  | 0.2  | 0.2 <sup>d</sup> | 0.3  | n.s.     |
| Juices                                            | 0.5 <sup>b</sup>  | 0.6  | 0.3 <sup>c</sup> | 0.5  | 0.043    |
| Sweetened beverages and energy drinks             | 0.3 <sup>b</sup>  | 0.5  | 0.1 <sup>c</sup> | 0.3  | 0.012    |
| Alcohol                                           | 0.3 <sup>b</sup>  | 0.3  | 0.3 <sup>c</sup> | 0.4  | n.s.     |
|                                                   | <i>n</i>          | %    | <i>n</i>         | %    | <i>p</i> |
| Hypothyroidism                                    |                   |      |                  |      |          |
| Yes                                               | 7                 | 7.1  | 14               | 10.9 | n.s.     |
| No                                                | 92                | 92.9 | 114              | 89.1 |          |
| On diet                                           |                   |      |                  |      |          |
| Yes                                               | 7                 | 7.1  | 40               | 31.3 | 0.000    |
| No                                                | 92                | 92.9 | 88               | 68.8 |          |
| International Physical Activity Questionnaire     |                   |      |                  |      |          |
| Low activity                                      | 29                | 29.3 | 22               | 17.2 | 0.030    |
| Moderate-high activity                            | 70                | 70.7 | 106              | 82.8 |          |
| Polish-adapted Mediterranean Diet                 |                   |      |                  |      |          |

---

|                        |    |      |     |      |       |
|------------------------|----|------|-----|------|-------|
| Low adherence          | 35 | 35.4 | 26  | 20.3 | 0.001 |
| Average-high adherence | 64 | 64.6 | 128 | 79.7 |       |

---

SD – standard deviation; <sup>a</sup> *n* = 97; <sup>b</sup> *n* = 98; <sup>c</sup> *n* = 126; <sup>d</sup> *n* = 127;

Cognitive Restraint: low CR – score <33, high CR – score ≥33.

**Table S3.** Participants' body mass index, symptoms of depression, impulsiveness, eating behaviors, diet, hypothyroidism, dieting and physical activity broken down by Uncontrolled Eating (UE) – median split; low UE  $n = 111$ , high UE  $n = 116$ .

|                                                   | Low UE            |      | High UE          |      |          |
|---------------------------------------------------|-------------------|------|------------------|------|----------|
|                                                   | Mean              | SD   | Mean             | SD   | <i>p</i> |
| Body Mass Index                                   | 21.6              | 3.2  | 23.1             | 4.0  | 0.002    |
| Beck Depression Inventory                         | 6.8               | 7.1  | 8.8              | 7.6  | 0.037    |
| Barratt Impulsiveness Scale                       |                   |      |                  |      |          |
| Total                                             | 58.2 <sup>a</sup> | 10.1 | 61.8             | 8.8  | 0.005    |
| Non-planning                                      | 22.6 <sup>a</sup> | 4.5  | 23.5             | 4.3  | n.s.     |
| Motor                                             | 19.0 <sup>a</sup> | 4.4  | 19.5             | 3.9  | n.s.     |
| Attentional                                       | 16.8 <sup>a</sup> | 3.6  | 19.4             | 3.6  | 0.000    |
| Three-Factor Eating Questionnaire                 |                   |      |                  |      |          |
| Cognitive Restraint                               | 32.2              | 14.9 | 34.3             | 13.9 | n.s.     |
| Uncontrolled Eating                               | 14.2              | 6.5  | 34.3             | 9.5  | 0.000    |
| Emotional Eating                                  | 15.0              | 14.4 | 34.6             | 20.6 | 0.000    |
| Food Frequency Questionnaire (aggregated)         |                   |      |                  |      |          |
| Sugar, sweets and snacks                          | 1.5               | 1.2  | 1.8              | 1.3  | n.s.     |
| Milk, fermented milk drinks and curd cheese       | 1.2               | 0.8  | 1.2              | 0.8  | n.s.     |
| Sweetened milk products                           | 0.3               | 0.4  | 0.4              | 0.5  | 0.021    |
| Cheese                                            | 0.6               | 0.5  | 0.6              | 0.4  | n.s.     |
| Eggs and egg dishes                               | 0.4               | 0.4  | 0.5              | 0.5  | n.s.     |
| Breakfast cereals                                 | 0.2               | 0.3  | 0.2              | 0.2  | n.s.     |
| Whole grain products                              | 0.9               | 0.7  | 0.9              | 0.6  | n.s.     |
| Refined grain products                            | 0.8 <sup>b</sup>  | 0.6  | 0.9              | 0.5  | n.s.     |
| Butter and cream                                  | 0.8 <sup>b</sup>  | 0.7  | 0.7 <sup>e</sup> | 0.7  | n.s.     |
| Other animal fats                                 | 0.0               | 0.1  | 0.0              | 0.1  | n.s.     |
| Vegetable oils                                    | 0.5               | 0.4  | 0.6              | 0.4  | n.s.     |
| Other edible fats                                 | 0.3               | 0.5  | 0.3              | 0.4  | n.s.     |
| Fruits                                            | 0.8               | 0.5  | 0.9 <sup>e</sup> | 0.6  | n.s.     |
| Dried fruit, fruit preserves and fruit condiments | 0.2               | 0.4  | 0.3              | 0.5  | n.s.     |
| Vegetables                                        | 1.0               | 0.6  | 0.9              | 0.5  | n.s.     |
| Dry and processed pulses                          | 0.2               | 0.3  | 0.2              | 0.3  | n.s.     |
| Potatoes                                          | 0.4               | 0.3  | 0.4              | 0.3  | n.s.     |
| Nuts and seeds                                    | 0.4               | 0.4  | 0.5              | 0.5  | n.s.     |
| Processed meats                                   | 0.7               | 0.7  | 0.7              | 0.7  | n.s.     |
| Red meat and venison                              | 0.2               | 0.2  | 0.2 <sup>d</sup> | 0.3  | n.s.     |
| White meat                                        | 0.4               | 0.3  | 0.4 <sup>d</sup> | 0.3  | n.s.     |
| Fish                                              | 0.2               | 0.3  | 0.2 <sup>d</sup> | 0.3  | n.s.     |
| Juices                                            | 0.4               | 0.5  | 0.4 <sup>d</sup> | 0.5  | n.s.     |
| Sweetened beverages and energy drinks             | 0.2               | 0.4  | 0.2 <sup>c</sup> | 0.3  | n.s.     |
| Alcohol                                           | 0.2               | 0.3  | 0.4 <sup>c</sup> | 0.4  | 0.004    |
|                                                   | <i>n</i>          | %    | <i>n</i>         | %    | <i>p</i> |
| Hypothyroidism                                    |                   |      |                  |      |          |
| Yes                                               | 14                | 12.6 | 7                | 6.0  | n.s.     |
| No                                                | 97                | 87.4 | 109              | 94.0 |          |
| On diet                                           |                   |      |                  |      |          |
| Yes                                               | 23                | 20.7 | 24               | 20.7 | n.s.     |
| No                                                | 88                | 79.3 | 92               | 79.3 |          |
| International Physical Activity Questionnaire     |                   |      |                  |      |          |
| Low activity                                      | 27                | 24.3 | 24               | 20.7 | n.s.     |
| Moderate-high activity                            | 84                | 75.7 | 92               | 79.3 |          |
| Polish-adapted Mediterranean Diet                 |                   |      |                  |      |          |

|                        |    |      |    |      |      |
|------------------------|----|------|----|------|------|
| Low adherence          | 30 | 27.0 | 31 | 26.7 | n.s. |
| Average-high adherence | 81 | 73.0 | 85 | 73.3 |      |

SD – standard deviation; <sup>a</sup> *n* = 109; <sup>b</sup> *n* = 110; <sup>c</sup> *n* = 113; <sup>d</sup> *n* = 114; <sup>e</sup> *n* = 115;  
 Uncontrolled Eating: low UE – score <25, high UE – score ≥25.

**Table S4.** Participants' body mass index, symptoms of depression, impulsiveness, eating behaviors, diet, hypothyroidism, dieting and physical activity broken down by Emotional eating (EE) – median split; low EE  $n = 103$ , high EE  $n = 124$ .

| Low EE                                            |                   |      | High EE          |      |          |
|---------------------------------------------------|-------------------|------|------------------|------|----------|
|                                                   | Mean              | SD   | Mean             | SD   | <i>p</i> |
| Body Mass Index                                   | 21.1              | 2.8  | 23.4             | 4.0  | 0.000    |
| Beck Depression Inventory                         | 6.2               | 6.7  | 9.2              | 7.7  | 0.002    |
| Barratt Impulsiveness Scale                       |                   |      |                  |      |          |
| Total                                             | 58.7 <sup>a</sup> | 11.0 | 61.2             | 8.2  | n.s.     |
| Non-planning                                      | 22.7 <sup>a</sup> | 4.7  | 23.4             | 4.2  | n.s.     |
| Motor                                             | 19.1 <sup>a</sup> | 4.8  | 19.4             | 3.5  | n.s.     |
| Attentional                                       | 17.1 <sup>a</sup> | 3.8  | 18.9             | 3.7  | 0.000    |
| Three-Factor Eating Questionnaire                 |                   |      |                  |      |          |
| Cognitive Restraint                               | 30.9              | 15.5 | 35.3             | 13.3 | 0.023    |
| Uncontrolled Eating                               | 18.0              | 10.9 | 29.8             | 12.1 | 0.000    |
| Emotional Eating                                  | 7.6               | 7.7  | 39.5             | 15.6 | 0.000    |
| Food Frequency Questionnaire (aggregated)         |                   |      |                  |      |          |
| Sugar, sweets and snacks                          | 1.4               | 1.2  | 1.9              | 1.3  | 0.002    |
| Milk, fermented milk drinks and curd cheese       | 1.2               | 0.8  | 1.3              | 0.8  | n.s.     |
| Sweetened milk products                           | 0.3               | 0.5  | 0.4              | 0.5  | n.s.     |
| Cheese                                            | 0.6               | 0.5  | 0.6              | 0.5  | n.s.     |
| Eggs and egg dishes                               | 0.4               | 0.4  | 0.4              | 0.4  | n.s.     |
| Breakfast cereals                                 | 0.2               | 0.3  | 0.2              | 0.2  | n.s.     |
| Whole grain products                              | 0.9               | 0.7  | 0.9              | 0.6  | n.s.     |
| Refined grain products                            | 0.9 <sup>b</sup>  | 0.6  | 0.8              | 0.5  | n.s.     |
| Butter and cream                                  | 0.8               | 0.7  | 0.7 <sup>d</sup> | 0.6  | n.s.     |
| Other animal fats                                 | 0.0               | 0.1  | 0.0              | 0.1  | n.s.     |
| Vegetable oils                                    | 0.5               | 0.4  | 0.5              | 0.4  | n.s.     |
| Other edible fats                                 | 0.3               | 0.5  | 0.3              | 0.3  | n.s.     |
| Fruits                                            | 0.8               | 0.5  | 0.9 <sup>e</sup> | 0.6  | n.s.     |
| Dried fruit, fruit preserves and fruit condiments | 0.3               | 0.4  | 0.3              | 0.4  | n.s.     |
| Vegetables                                        | 1.0               | 0.5  | 0.9              | 0.5  | n.s.     |
| Dry and processed pulses                          | 0.2               | 0.3  | 0.2              | 0.2  | n.s.     |
| Potatoes                                          | 0.4               | 0.4  | 0.4              | 0.3  | n.s.     |
| Nuts and seeds                                    | 0.4               | 0.4  | 0.5              | 0.5  | n.s.     |
| Processed meats                                   | 0.7               | 0.8  | 0.6 <sup>d</sup> | 0.6  | n.s.     |
| Red meat and venison                              | 0.2               | 0.3  | 0.2 <sup>d</sup> | 0.3  | n.s.     |
| White meat                                        | 0.3               | 0.3  | 0.4 <sup>d</sup> | 0.3  | n.s.     |
| Fish                                              | 0.2               | 0.2  | 0.2 <sup>d</sup> | 0.3  | n.s.     |
| Juices                                            | 0.4               | 0.6  | 0.4 <sup>d</sup> | 0.5  | n.s.     |
| Sweetened beverages and energy drinks             | 0.2               | 0.4  | 0.2 <sup>c</sup> | 0.3  | n.s.     |
| Alcohol                                           | 0.3 <sup>b</sup>  | 0.4  | 0.3 <sup>d</sup> | 0.4  | n.s.     |
|                                                   | <i>n</i>          | %    | <i>n</i>         | %    | <i>p</i> |
| Hypothyroidism                                    |                   |      |                  |      |          |
| Yes                                               | 9                 | 8.7  | 12               | 9.7  | n.s.     |
| No                                                | 94                | 91.3 | 112              | 90.3 |          |
| On diet                                           |                   |      |                  |      |          |
| Yes                                               | 24                | 23.3 | 23               | 18.5 | n.s.     |
| No                                                | 79                | 76.7 | 101              | 81.5 |          |
| International Physical Activity Questionnaire     |                   |      |                  |      |          |
| Low activity                                      | 23                | 22.3 | 28               | 22.6 | n.s.     |
| Moderate-high activity                            | 80                | 77.7 | 96               | 77.4 |          |
| Polish-adapted Mediterranean Diet                 |                   |      |                  |      |          |

---

|                        |    |      |    |      |      |
|------------------------|----|------|----|------|------|
| Low adherence          | 27 | 26.2 | 34 | 27.4 | n.s. |
| Average-high adherence | 76 | 73.3 | 90 | 72.6 |      |

---

SD – standard deviation; <sup>a</sup> *n* = 101; <sup>b</sup> *n* = 102; <sup>c</sup> *n* = 121; <sup>d</sup> *n* = 122; <sup>e</sup> *n* = 123;  
Emotional Eating: low EE – score <25, high EE – score ≥25.
